# Supplementary material for: Membrane-Based Solvent Exchange Process for Purification of API Crystal Suspensions
Source: MDPI journal article supplement (doi:10.3390/membranes13030263), 2023-02-23
Supplement: s1 [file s1]

# Membrane-based solvent exchange process for purification of API crystal suspensions

Fatima Anjum, Maximilian Wessner and Gabriele Sadowski\*

Department of Biochemical and Chemical Engineering, Laboratory of Thermodynamics, TU Dortmund University, Emil-Figge-Str. 70, D-44227 Dortmund, Germany

\*Correspondence: [Gabriele.sadowski@tu-dortmund.de](mailto:Gabriele.sadowski@tu-dortmund.de) (G.S.); Tel: +49-231-755-2635

## Supporting Information

### 3.1. Membrane selection for the solvent exchange process

Table S1 Average permeate flux of different OSN membranes at 30 bar and 25 C. Tabulated data from figure 2 of manuscript.

| Membranes | Feed Composition | Average Flux / $\text{kg (m}^2 \text{ h)}^{-1}$ | Error |
|-----------|------------------|-------------------------------------------------|-------|
| Duramem   | Pure Water       | 158                                             | 6     |
|           | 10 wt% Ethanol   | 63                                              | 2     |
| AMS       | Pure Water       | 69.3                                            | 0.3   |
|           | 10 wt% Ethanol   | 25.2                                            | 0.2   |
| Solsep 1  | Pure Water       | 123.1                                           | 0.5   |
|           | 10 wt% Ethanol   | 61.2                                            | 0.5   |
| Solsep 2  | Pure Water       | -                                               | -     |
|           | 10 wt% Ethanol   | -                                               | -     |
| GMT       | Pure Water       | -                                               | -     |
|           | 10 wt% Ethanol   | -                                               | -     |

Table S2 Permeate flux v/s time data of different OSN membranes at 30 bar and 25 C.

| AMS Pure Water |                                  | AMS 10 wt% Ethanol |                                  | Solsep 1 Pure Water |                                  | Solsep 1 10 wt% Ethanol |                                  | Duramem Pure Water |                                  | Duramem 10 wt% Ethanol |                                  |
|----------------|----------------------------------|--------------------|----------------------------------|---------------------|----------------------------------|-------------------------|----------------------------------|--------------------|----------------------------------|------------------------|----------------------------------|
| Time           | Flux                             | Time               | Flux                             | Time                | Flux                             | Time                    | Flux                             | Time               | Flux                             | Time                   | Flux                             |
| s              | $\text{kg (m}^2 \text{ h)}^{-1}$ | s                  | $\text{kg (m}^2 \text{ h)}^{-1}$ | s                   | $\text{kg (m}^2 \text{ h)}^{-1}$ | s                       | $\text{kg (m}^2 \text{ h)}^{-1}$ | s                  | $\text{kg (m}^2 \text{ h)}^{-1}$ | s                      | $\text{kg (m}^2 \text{ h)}^{-1}$ |
| 0.0            |                                  | 0.0                | 32.2                             | 10.0                | 128.1                            | 10.0                    | 69.3                             | 7.0                | 132.4                            | 7.0                    | 7.6                              |
| 10.0           | 73.3                             | 10.0               | 29.3                             | 20.0                | 137.1                            | 20.0                    | 68.0                             | 14.0               | 141.0                            | 14.0                   | 11.4                             |
| 20.0           | 72.0                             | 20.0               | 30.3                             | 30.0                | 132.9                            | 30.0                    | 69.3                             | 21.0               | 132.4                            | 21.0                   | 10.5                             |
| 30.0           | 67.3                             | 30.0               | 27.3                             | 40.0                | 130.9                            | 40.0                    | 64.7                             | 28.0               | 138.1                            | 28.0                   | 18.1                             |
| 40.0           | 76.0                             | 40.0               | 29.4                             | 50.0                | 129.0                            | 50.0                    | 64.6                             | 35.0               | 142.9                            | 35.0                   | 23.8                             |
| 50.0           | 71.3                             | 50.0               | 27.5                             | 60.0                | 126.8                            | 60.0                    | 62.0                             | 42.0               | 136.2                            | 42.0                   | 21.9                             |
| 60.0           | 71.3                             | 60.0               | 26.6                             | 70.0                | 130.9                            | 70.0                    | 63.3                             | 49.0               | 138.1                            | 49.0                   | 23.8                             |
| 70.0           | 73.3                             | 70.0               | 26.8                             | 80.0                | 124.2                            | 80.0                    | 66.0                             | 56.0               | 143.8                            | 56.0                   | 27.6                             |
| 80.0           | 73.3                             | 80.0               | 26.7                             | 90.0                | 130.7                            | 90.0                    | 72.7                             | 63.0               | 136.2                            | 63.0                   | 26.7                             |
| 90.0           | 71.9                             | 90.0               | 25.7                             | 100.0               | 125.0                            | 100.0                   | 70.0                             | 70.0               | 153.3                            | 70.0                   | 28.6                             |
| 100.0          | 71.3                             | 100.0              | 26.7                             | 110.0               | 127.8                            | 110.0                   | 72.6                             | 77.0               | 130.5                            | 77.0                   | 28.6                             |
| 110.0          | 71.3                             | 110.0              | 25.6                             | 120.0               | 124.1                            | 120.0                   | 69.3                             | 84.0               | 136.2                            | 84.0                   | 32.4                             |

|       |      |       |      |       |       |       |      |       |       |       |      |
|-------|------|-------|------|-------|-------|-------|------|-------|-------|-------|------|
| 120.0 | 73.3 | 120.0 | 25.5 | 130.0 | 126.7 | 130.0 | 68.0 | 91.0  | 139.0 | 91.0  | 36.2 |
| 130.0 | 72.6 | 130.0 | 23.6 | 140.0 | 124.0 | 140.0 | 68.0 | 98.0  | 129.5 | 98.0  | 41.0 |
| 140.0 | 71.3 | 140.0 | 27.4 | 150.0 | 122.3 | 150.0 | 66.0 | 105.0 | 135.2 | 105.0 | 42.9 |
| 150.0 | 72.6 | 150.0 | 25.5 | 160.0 | 125.0 | 160.0 | 66.0 | 112.0 | 137.1 | 112.0 | 41.0 |
| 160.0 | 73.3 | 160.0 | 25.7 | 170.0 | 121.6 | 170.0 | 66.6 | 119.0 | 133.3 | 119.0 | 42.9 |
| 170.0 | 72.6 | 170.0 | 26.0 | 180.0 | 125.2 | 180.0 | 61.3 | 126.0 | 134.3 | 126.0 | 43.8 |
| 180.0 | 70.6 | 180.0 | 23.9 | 190.0 | 122.9 | 190.0 | 64.0 | 133.0 | 140.0 | 133.0 | 45.7 |
| 190.0 | 70.6 | 190.0 | 26.8 | 200.0 | 124.6 | 200.0 | 64.0 | 140.0 | 129.5 | 140.0 | 57.1 |
| 200.0 | 71.9 | 200.0 | 26.4 | 210.0 | 124.6 | 210.0 | 61.3 | 147.0 | 133.3 | 147.0 | 54.3 |
| 210.0 | 72.0 | 210.0 | 23.2 | 220.0 | 124.0 | 220.0 | 63.3 | 154.0 | 133.3 | 154.0 | 48.6 |
| 220.0 | 73.9 | 220.0 | 25.7 | 230.0 | 120.9 | 230.0 | 56.7 | 161.0 | 129.5 | 161.0 | 51.4 |
| 230.0 | 70.6 | 230.0 | 25.6 | 240.0 | 126.4 | 240.0 | 59.3 | 168.0 | 149.5 | 168.0 | 58.1 |
| 240.0 | 70.6 | 240.0 | 24.1 | 250.0 | 120.0 | 250.0 | 62.0 | 175.0 | 125.7 | 175.0 | 50.5 |
| 250.0 | 70.6 | 250.0 | 24.7 | 260.0 | 127.6 | 260.0 | 62.7 | 182.0 | 133.3 | 182.0 | 57.1 |
| 260.0 | 72.7 | 260.0 | 23.6 | 270.0 | 119.6 | 270.0 | 60.7 | 189.0 | 139.0 | 189.0 | 70.5 |
| 270.0 | 70.0 | 270.0 | 26.4 | 280.0 | 122.3 | 280.0 | 67.3 | 196.0 | 126.7 | 196.0 | 58.1 |
| 280.0 | 74.0 | 280.0 | 25.7 | 290.0 | 124.0 | 290.0 | 66.7 | 203.0 | 135.2 | 203.0 | 63.8 |
| 290.0 | 70.6 | 290.0 | 24.5 | 300.0 | 122.5 | 300.0 | 66.7 | 210.0 | 137.1 | 210.0 | 72.4 |
| 300.0 | 70.7 | 300.0 | 23.7 | 310.0 | 121.3 | 310.0 | 61.3 | 217.0 | 128.6 | 217.0 | 62.9 |
| 310.0 | 70.0 | 310.0 | 25.1 | 320.0 | 120.7 | 320.0 | 66.0 | 224.0 | 136.2 | 224.0 | 76.2 |
| 320.0 | 71.3 | 320.0 | 25.9 | 330.0 | 125.3 | 330.0 | 63.3 | 231.0 | 142.9 | 231.0 | 70.5 |
| 330.0 | 71.3 | 330.0 | 23.1 | 340.0 | 120.6 | 340.0 | 64.7 | 238.0 | 131.4 | 238.0 | 67.6 |
| 340.0 | 72.0 | 340.0 | 24.8 | 350.0 | 123.2 | 350.0 | 63.3 | 245.0 | 136.2 | 245.0 | 74.3 |
| 350.0 | 69.3 | 350.0 | 24.7 | 360.0 | 119.4 | 360.0 | 62.0 | 252.0 | 136.2 | 252.0 | 64.8 |
| 360.0 | 69.3 | 360.0 | 24.2 | 370.0 | 120.3 | 370.0 | 63.3 | 259.0 | 132.4 | 259.0 | 72.4 |
| 370.0 | 71.3 | 370.0 | 25.0 | 380.0 | 124.3 | 380.0 | 63.3 | 266.0 | 152.4 | 266.0 | 71.4 |
| 380.0 | 70.0 | 380.0 | 25.7 | 390.0 | 121.4 | 390.0 | 64.0 | 273.0 | 128.6 | 273.0 | 64.8 |
| 390.0 | 69.3 | 390.0 | 23.8 | 400.0 | 122.7 | 400.0 | 61.3 | 280.0 | 134.3 | 280.0 | 73.3 |
| 400.0 | 69.3 | 400.0 | 24.8 | 410.0 | 114.2 | 410.0 | 63.3 | 287.0 | 139.0 | 287.0 | 61.9 |
| 410.0 | 70.0 | 410.0 | 25.2 | 420.0 | 123.4 | 420.0 | 63.3 | 294.0 | 166.7 | 294.0 | 68.6 |
| 420.0 | 72.0 | 420.0 | 24.2 | 430.0 | 122.3 | 430.0 | 66.0 | 301.0 | 140.0 | 301.0 | 68.6 |
| 430.0 | 68.0 | 430.0 | 24.6 | 440.0 | 119.5 | 440.0 | 56.7 | 308.0 | 138.1 | 308.0 | 68.6 |
| 440.0 | 71.3 | 440.0 | 25.8 | 450.0 | 121.5 | 450.0 | 63.3 | 315.0 | 381.0 | 315.0 | 66.7 |
| 450.0 | 70.0 | 450.0 | 23.7 | 460.0 | 121.4 | 460.0 | 62.0 | 322.0 | 131.4 | 322.0 | 66.7 |
| 460.0 | 67.3 | 460.0 | 25.8 | 470.0 | 120.8 | 470.0 | 65.3 | 329.0 | 149.5 | 329.0 | 63.8 |
| 470.0 | 70.0 | 470.0 | 22.6 | 480.0 | 119.9 | 480.0 | 60.7 | 336.0 | 379.0 | 336.0 | 68.6 |
| 480.0 | 71.3 | 480.0 | 24.6 | 490.0 | 122.4 | 490.0 | 62.0 | 343.0 | 129.5 | 343.0 | 68.6 |
| 490.0 | 69.3 | 490.0 | 26.0 |       |       | 500.0 | 60.6 | 350.0 | 133.3 | 350.0 | 60.0 |
| 500.0 | 70.0 | 500.0 | 25.4 |       |       | 510.0 | 65.3 | 357.0 | 379.0 | 357.0 | 67.6 |
| 510.0 | 69.3 | 510.0 | 23.6 |       |       | 520.0 | 61.8 | 364.0 | 139.0 | 364.0 | 66.7 |
| 520.0 | 68.6 | 520.0 | 23.8 |       |       | 530.0 | 56.6 | 371.0 | 127.6 | 371.0 | 71.4 |
| 530.0 | 68.0 | 530.0 | 25.4 |       |       | 540.0 | 63.3 | 378.0 | 352.4 | 378.0 | 42.9 |
| 540.0 | 71.3 | 540.0 | 23.9 |       |       | 550.0 | 58.6 |       |       | 385.0 | 60.0 |
| 550.0 | 67.9 | 550.0 | 26.1 |       |       | 560.0 | 57.3 |       |       | 392.0 | 67.6 |
| 560.0 | 67.3 | 560.0 | 24.5 |       |       | 570.0 | 64.0 |       |       | 399.0 | 65.7 |
| 570.0 | 70.6 | 570.0 | 26.0 |       |       | 580.0 | 57.3 |       |       | 406.0 | 64.8 |
| 580.0 | 69.3 | 580.0 | 24.2 |       |       | 590.0 | 60.0 |       |       | 413.0 | 61.0 |
| 590.0 | 66.6 | 590.0 | 23.9 |       |       | 600.0 | 59.3 |       |       | 420.0 | 61.9 |
| 600.0 | 70.0 | 600.0 | 23.7 |       |       | 610.0 | 58.0 |       |       | 427.0 | 65.7 |

|       |      |       |      |       |      |       |       |
|-------|------|-------|------|-------|------|-------|-------|
| 610.0 | 68.0 | 610.0 | 27.7 | 620.0 | 59.3 | 434.0 | 64.8  |
| 620.0 | 67.9 | 620.0 | 22.7 | 630.0 | 60.6 | 441.0 | 71.0  |
| 630.0 | 70.6 | 630.0 | 24.2 | 640.0 | 60.0 | 448.0 | 61.9  |
| 640.0 | 68.6 | 640.0 | 23.9 | 650.0 | 54.0 | 455.0 | 49.5  |
| 650.0 | 66.0 | 650.0 | 24.2 | 660.0 | 64.6 | 462.0 | 139.0 |
| 660.0 | 68.6 | 660.0 | 25.5 | 670.0 | 58.6 | 469.0 | 63.8  |
| 670.0 | 68.0 | 670.0 | 24.6 | 680.0 | 58.6 | 476.0 | 71.4  |
| 680.0 | 68.6 | 680.0 | 24.2 | 690.0 | 57.3 | 483.0 | 113.3 |
| 690.0 | 68.6 | 690.0 | 24.6 | 700.0 | 58.6 | 490.0 | 68.6  |
| 700.0 | 68.0 | 700.0 | 24.6 | 710.0 | 62.0 | 497.0 | 56.2  |
| 710.0 | 66.7 | 710.0 | 25.5 | 720.0 | 58.0 | 504.0 | 135.2 |
| 720.0 | 66.7 | 720.0 | 23.1 | 730.0 | 58.6 | 511.0 | 61.9  |
| 730.0 | 69.3 | 730.0 | 22.0 | 740.0 | 58.0 | 518.0 | 52.4  |
| 740.0 | 65.3 | 740.0 | 22.6 | 750.0 | 60.0 | 525.0 | 135.2 |
| 750.0 | 67.9 |       |      | 760.0 | 60.6 | 532.0 | 49.5  |
| 760.0 | 68.0 |       |      | 770.0 | 54.6 | 539.0 | 63.8  |
| 770.0 | 67.3 |       |      | 780.0 | 58.0 | 546.0 | 135.2 |
| 780.0 | 68.7 |       |      | 790.0 | 63.3 | 553.0 | 61.0  |
| 790.0 | 66.6 |       |      | 800.0 | 56.6 | 560.0 | 63.8  |
| 800.0 | 66.6 |       |      | 810.0 | 58.6 | 567.0 | 136.2 |
| 810.0 | 66.0 |       |      | 820.0 | 58.0 | 574.0 | 61.0  |
| 820.0 | 68.0 |       |      | 830.0 | 58.0 | 581.0 | 61.9  |
| 830.0 | 66.6 |       |      | 840.0 | 57.3 | 588.0 | 141.9 |
| 840.0 | 67.3 |       |      | 850.0 | 57.3 | 595.0 | 51.4  |
| 850.0 | 65.9 |       |      | 860.0 | 59.3 | 602.0 | 59.0  |
| 860.0 | 65.3 |       |      | 870.0 | 60.0 | 609.0 | 130.5 |
| 870.0 | 65.3 |       |      | 880.0 | 58.6 | 616.0 | 61.0  |
| 880.0 | 67.3 |       |      | 890.0 | 58.0 | 623.0 | 63.8  |
| 890.0 | 67.3 |       |      | 900.0 | 56.6 | 630.0 | 117.1 |
| 900.0 | 65.3 |       |      | 910.0 | 58.0 | 637.0 | 53.3  |
| 910.0 | 66.6 |       |      | 920.0 | 61.3 | 644.0 | 65.7  |
| 920.0 | 65.3 |       |      | 930.0 | 55.3 | 651.0 | 121.0 |
| 930.0 | 66.7 |       |      | 940.0 | 57.3 | 658.0 | 56.2  |
| 940.0 | 66.6 |       |      | 950.0 | 58.6 | 665.0 | 52.4  |
| 950.0 | 65.3 |       |      |       |      | 672.0 | 121.9 |
| 960.0 | 66.0 |       |      |       |      | 679.0 | 60.0  |
| 970.0 | 64.6 |       |      |       |      | 686.0 | 57.1  |
| 980.0 | 66.0 |       |      |       |      | 693.0 | 107.6 |
| 990.0 | 64.0 |       |      |       |      | 700.0 | 61.9  |
|       |      |       |      |       |      | 707.0 | 53.3  |
|       |      |       |      |       |      | 714.0 | 117.1 |
|       |      |       |      |       |      | 721.0 | 54.3  |
|       |      |       |      |       |      | 728.0 | 54.3  |
|       |      |       |      |       |      | 735.0 | 116.2 |
|       |      |       |      |       |      | 742.0 | 43.8  |
|       |      |       |      |       |      | 749.0 | 59.0  |
|       |      |       |      |       |      | 756.0 | 108.6 |
|       |      |       |      |       |      | 763.0 | 59.0  |
|       |      |       |      |       |      | 770.0 | 48.6  |

---

|  |            |       |
|--|------------|-------|
|  | 777.0      | 111.4 |
|  | 784.0      | 41.9  |
|  | 791.0      | 53.3  |
|  | 798.0      | 103.8 |
|  | 805.0      | 53.3  |
|  | 812.0      | 54.3  |
|  | 819.0      | 101.0 |
|  | 826.0      | 45.7  |
|  | 833.0      | 55.2  |
|  | 840.0      | 102.9 |
|  | 847.0      | 51.4  |
|  | 854.0      | 49.5  |
|  | 861.0      | 96.2  |
|  | 868.0      | 57.1  |
|  | 875.0      | 52.4  |
|  | 882.0      | 135.2 |
|  | 889.0      | 44.8  |
|  | 896.0      | 58.1  |
|  | 903.0      | 122.9 |
|  | 910.0      | 58.1  |
|  | 917.0      | 52.4  |
|  | 924.0      | 115.2 |
|  | 931.0      | 54.3  |
|  | 938.0      | 61.0  |
|  | 945.0      | 123.8 |
|  | 952.0      | 51.4  |
|  | 959.0      | 49.5  |
|  | 966.0      | 118.1 |
|  | 973.0      | 52.4  |
|  | 980.0      | 61.0  |
|  | 987.0      | 99.0  |
|  | 994.0      | 49.5  |
|  | 1001.<br>0 | 44.8  |
|  | 1008.<br>0 | 96.2  |
|  | 1015.<br>0 | 39.0  |
|  | 1022.<br>0 | 44.8  |
|  | 1029.<br>0 | 81.9  |
|  | 1036.<br>0 | 30.5  |
|  | 1043.<br>0 | 34.3  |
|  | 1050.<br>0 | 78.1  |
|  | 1057.<br>0 | 36.2  |

---

|  |            |      |
|--|------------|------|
|  | 1064.<br>0 | 29.5 |
|  | 1071.<br>0 | 73.3 |
|  | 1078.<br>0 | 25.7 |
|  | 1085.<br>0 | 20.0 |
|  | 1092.<br>0 | 67.6 |
|  | 1099.<br>0 | 33.3 |
|  | 1106.<br>0 | 25.7 |
|  | 1113.<br>0 | 61.0 |
|  | 1120.<br>0 | 18.1 |
|  | 1127.<br>0 | 28.6 |
|  | 1134.<br>0 | 42.9 |
|  | 1141.<br>0 | 28.6 |
|  | 1148.<br>0 | 14.3 |
|  | 1155.<br>0 | 46.7 |
|  | 1162.<br>0 | 21.0 |

### 3.2. Determining the number of stages and the amount of water required for solvent exchange

Table S3 Permeate flux v/s time data from diafiltration experiment with feed containing 5 wt% ethanol (rest water). Corresponds to the Figure 3 of the manuscript.

| Ethanol water system |                                          |           |                                          |           |                                          |           |                                          |
|----------------------|------------------------------------------|-----------|------------------------------------------|-----------|------------------------------------------|-----------|------------------------------------------|
| Stage 0              |                                          | Stage 1   |                                          | Stage 2   |                                          | Stage 3   |                                          |
| Time<br>s            | Flux<br>$\text{kg (m}^2 \text{ h)}^{-1}$ | Time<br>s | Flux<br>$\text{kg (m}^2 \text{ h)}^{-1}$ | Time<br>s | Flux<br>$\text{kg (m}^2 \text{ h)}^{-1}$ | Time<br>s | Flux<br>$\text{kg (m}^2 \text{ h)}^{-1}$ |
| 7.00                 | 55.24                                    | 7.00      | 73.33                                    | 7.00      | 95.24                                    | 7.00      | 100.95                                   |
| 14.00                | 67.62                                    | 14.00     | 67.62                                    | 14.00     | 102.86                                   | 14.00     | 121.90                                   |
| 21.00                | 68.57                                    | 21.00     | 80.00                                    | 21.00     | 107.62                                   | 21.00     | 115.24                                   |
| 28.00                | 78.10                                    | 28.00     | 81.90                                    | 28.00     | 112.38                                   | 28.00     | 119.05                                   |
| 35.00                | 79.05                                    | 35.00     | 80.95                                    | 35.00     | 120.95                                   | 35.00     | 121.90                                   |
| 42.00                | 80.00                                    | 42.00     | 83.81                                    | 42.00     | 112.38                                   | 42.00     | 108.57                                   |
| 49.00                | 80.95                                    | 49.00     | 86.67                                    | 49.00     | 120.95                                   | 49.00     | 122.86                                   |
| 56.00                | 95.24                                    | 56.00     | 81.90                                    | 56.00     | 127.62                                   | 56.00     | 146.67                                   |
| 63.00                | 98.10                                    | 63.00     | 81.90                                    | 63.00     | 117.14                                   | 63.00     | 127.62                                   |
| 70.00                | 92.38                                    | 70.00     | 86.67                                    | 70.00     | 121.90                                   | 70.00     | 133.33                                   |

|        |        |        |        |        |        |        |        |
|--------|--------|--------|--------|--------|--------|--------|--------|
| 77.00  | 85.71  | 77.00  | 84.76  | 77.00  | 125.71 | 77.00  | 139.05 |
| 84.00  | 97.14  | 84.00  | 82.86  | 84.00  | 117.14 | 84.00  | 130.48 |
| 91.00  | 96.19  | 91.00  | 87.62  | 91.00  | 120.00 | 91.00  | 134.29 |
| 98.00  | 96.19  | 98.00  | 101.90 | 98.00  | 122.86 | 98.00  | 139.05 |
| 105.00 | 100.00 | 105.00 | 108.57 | 105.00 | 114.29 | 105.00 | 128.57 |
| 112.00 | 100.00 | 112.00 | 105.71 | 112.00 | 119.05 | 112.00 | 135.24 |
| 119.00 | 98.10  | 119.00 | 109.52 | 119.00 | 124.76 | 119.00 | 137.14 |
| 126.00 | 93.33  | 126.00 | 110.48 | 126.00 | 111.43 | 126.00 | 125.71 |
| 133.00 | 98.10  | 133.00 | 104.76 | 133.00 | 118.10 | 133.00 | 131.43 |
| 140.00 | 110.48 | 140.00 | 106.67 | 140.00 | 124.76 | 140.00 | 129.52 |
| 147.00 | 89.52  | 147.00 | 108.57 | 147.00 | 108.57 | 147.00 | 124.76 |
| 154.00 | 92.38  | 154.00 | 117.14 | 154.00 | 108.57 | 154.00 | 125.71 |
| 161.00 | 100.95 | 161.00 | 100.00 | 161.00 | 115.24 | 161.00 | 125.71 |
| 168.00 | 100.00 | 168.00 | 98.10  | 168.00 | 118.10 | 168.00 | 121.90 |
| 175.00 | 95.24  | 175.00 | 106.67 | 175.00 | 114.29 | 175.00 | 122.86 |
| 182.00 | 99.05  | 182.00 | 105.71 | 182.00 | 116.19 | 182.00 | 125.71 |
| 189.00 | 98.10  | 189.00 | 100.95 | 189.00 | 113.33 | 189.00 | 117.14 |
| 196.00 | 89.52  | 196.00 | 104.76 | 196.00 | 111.43 | 196.00 | 121.90 |
| 203.00 | 92.38  | 203.00 | 110.48 | 203.00 | 111.43 | 203.00 | 121.90 |
| 210.00 | 98.10  | 210.00 | 100.00 | 210.00 | 117.14 | 210.00 | 113.33 |
| 217.00 | 90.48  | 217.00 | 94.29  | 217.00 | 110.48 | 217.00 | 119.05 |
| 224.00 | 94.29  | 224.00 | 102.86 | 224.00 | 116.19 | 224.00 | 158.10 |
| 231.00 | 88.57  | 231.00 | 100.95 | 231.00 | 122.86 | 231.00 | 116.19 |
| 238.00 | 90.48  | 238.00 | 99.05  | 238.00 | 112.38 | 238.00 | 118.10 |
| 245.00 | 104.76 | 245.00 | 100.00 | 245.00 | 117.14 | 245.00 | 326.67 |
| 252.00 | 77.14  | 252.00 | 102.86 | 252.00 | 123.81 | 252.00 | 122.86 |
| 259.00 | 95.24  | 259.00 | 96.19  | 259.00 | 100.95 | 259.00 | 112.38 |
| 266.00 | 87.62  | 266.00 | 99.05  | 266.00 | 116.19 | 266.00 | 317.14 |
| 273.00 | 101.90 | 273.00 | 100.95 | 273.00 | 118.10 | 273.00 | 117.14 |
| 280.00 | 77.14  | 280.00 | 112.38 | 280.00 | 120.00 | 280.00 | 120.00 |
| 287.00 | 90.48  | 287.00 | 103.81 | 287.00 | 165.71 | 287.00 | 334.29 |
| 294.00 | 87.62  | 294.00 | 107.62 | 294.00 | 109.96 | 294.00 | 121.90 |
| 301.00 | 96.19  | 301.00 | 113.33 | 301.00 | 107.62 | 301.00 | 113.33 |
| 308.00 | 80.00  | 308.00 | 93.33  | 308.00 | 311.43 | 308.00 | 337.14 |
| 315.00 | 90.48  | 315.00 | 100.95 | 315.00 | 113.33 | 315.00 | 120.95 |
| 322.00 | 83.81  | 322.00 | 104.76 | 322.00 | 113.33 | 322.00 | 126.67 |
| 329.00 | 98.10  | 329.00 | 100.95 | 329.00 | 326.67 | 329.00 | 320.95 |
| 336.00 | 78.10  | 336.00 | 257.14 | 336.00 | 108.57 | 336.00 | 122.86 |
| 343.00 | 83.81  | 343.00 | 102.86 | 343.00 | 107.62 | 343.00 | 118.10 |
| 350.00 | 80.95  | 350.00 | 96.19  | 350.00 | 319.05 | 350.00 | 315.24 |
| 357.00 | 92.38  | 357.00 | 267.62 | 357.00 | 110.48 | 357.00 | 119.05 |
| 364.00 | 89.52  | 364.00 | 94.29  | 364.00 | 112.38 | 364.00 | 125.71 |
| 371.00 | 75.24  | 371.00 | 93.33  | 371.00 | 309.52 | 371.00 | 305.71 |
| 378.00 | 81.39  | 378.00 | 262.86 | 378.00 | 113.33 | 378.00 | 123.81 |
| 385.00 | 88.57  | 385.00 | 101.90 | 385.00 | 114.29 | 385.00 | 115.24 |
| 392.00 | 85.71  | 392.00 | 105.71 | 392.00 | 312.38 | 392.00 | 294.29 |
| 399.00 | 82.86  | 399.00 | 278.10 | 399.00 | 104.76 | 399.00 | 80.00  |
| 406.00 | 143.81 | 406.00 | 117.14 | 406.00 | 110.48 | 406.00 | 67.62  |
| 413.00 | 81.39  | 413.00 | 99.05  | 413.00 | 289.52 | 413.00 | 144.76 |

|        |        |        |        |        |        |
|--------|--------|--------|--------|--------|--------|
| 420.00 | 74.29  | 420.00 | 290.48 | 420.00 | 110.48 |
| 427.00 | 184.76 | 427.00 | 100.00 | 427.00 | 114.29 |
| 434.00 | 83.98  | 434.00 | 102.86 | 434.00 | 263.81 |
| 441.00 | 71.43  | 441.00 | 277.14 | 441.00 | 97.14  |
| 448.00 | 184.76 | 448.00 | 101.90 | 448.00 | 72.38  |
| 455.00 | 87.62  | 455.00 | 106.67 | 455.00 | 215.24 |
| 462.00 | 73.33  | 462.00 | 260.95 | 462.00 | 68.57  |
| 469.00 | 180.95 | 469.00 | 108.57 | 469.00 | 56.19  |
| 476.00 | 81.90  | 476.00 | 83.81  | 476.00 | 166.67 |
| 483.00 | 82.86  | 483.00 | 265.71 | 483.00 | 52.38  |
| 490.00 | 175.24 | 490.00 | 87.62  | 490.00 | 59.05  |
| 497.00 | 83.81  | 497.00 | 89.52  | 497.00 | 116.19 |
| 504.00 | 80.00  | 504.00 | 205.71 |        |        |
| 511.00 | 167.62 | 511.00 | 52.38  |        |        |
| 518.00 | 83.81  | 518.00 | 54.29  |        |        |
| 525.00 | 80.95  | 525.00 | 120.00 |        |        |
| 532.00 | 173.33 |        |        |        |        |
| 539.00 | 76.19  |        |        |        |        |
| 546.00 | 89.52  |        |        |        |        |
| 553.00 | 165.71 |        |        |        |        |
| 560.00 | 81.90  |        |        |        |        |
| 567.00 | 75.24  |        |        |        |        |
| 574.00 | 177.14 |        |        |        |        |
| 581.00 | 72.38  |        |        |        |        |
| 588.00 | 82.86  |        |        |        |        |
| 595.00 | 171.43 |        |        |        |        |
| 602.00 | 79.05  |        |        |        |        |
| 609.00 | 65.71  |        |        |        |        |
| 616.00 | 140.95 |        |        |        |        |

Table S4 Permeate flux v/s time data for diafiltration with an aqueous feed containing 0.1 wt% model particles and 5 wt% ethanol (rest water). Corresponds to the Figure 3 of the manuscript.

| Ethanol water model particle system |                                     |         |                                     |         |                                     |         |                                     |
|-------------------------------------|-------------------------------------|---------|-------------------------------------|---------|-------------------------------------|---------|-------------------------------------|
| Stage 0                             |                                     | Stage 1 |                                     | Stage 2 |                                     | Stage 3 |                                     |
| Time                                | Flux                                | Time    | Flux                                | Time    | Flux                                | Time    | Flux                                |
| s                                   | kg (m <sup>2</sup> h) <sup>-1</sup> | s       | kg (m <sup>2</sup> h) <sup>-1</sup> | s       | kg (m <sup>2</sup> h) <sup>-1</sup> | s       | kg (m <sup>2</sup> h) <sup>-1</sup> |
| 7.00                                | 50.48                               | 7.00    | 58.10                               | 7.00    | 70.48                               | 7.00    | 90.48                               |
| 14.00                               | 49.52                               | 14.00   | 64.76                               | 14.00   | 82.86                               | 14.00   | 93.33                               |
| 21.00                               | 57.14                               | 21.00   | 75.24                               | 21.00   | 91.43                               | 21.00   | 96.19                               |
| 28.00                               | 67.62                               | 28.00   | 78.10                               | 28.00   | 77.14                               | 28.00   | 96.19                               |
| 35.00                               | 66.67                               | 35.00   | 80.00                               | 35.00   | 88.57                               | 35.00   | 99.05                               |
| 42.00                               | 57.14                               | 42.00   | 67.62                               | 42.00   | 84.76                               | 42.00   | 104.76                              |
| 49.00                               | 65.71                               | 49.00   | 80.95                               | 49.00   | 105.71                              | 49.00   | 93.33                               |
| 56.00                               | 55.24                               | 56.00   | 73.33                               | 56.00   | 78.10                               | 56.00   | 97.14                               |
| 63.00                               | 71.43                               | 63.00   | 80.95                               | 63.00   | 94.29                               | 63.00   | 95.24                               |
| 70.00                               | 60.95                               | 70.00   | 76.19                               | 70.00   | 86.67                               | 70.00   | 102.86                              |
| 77.00                               | 73.33                               | 77.00   | 80.95                               | 77.00   | 100.95                              | 77.00   | 94.29                               |

|        |        |        |        |        |        |        |        |
|--------|--------|--------|--------|--------|--------|--------|--------|
| 84.00  | 67.62  | 84.00  | 81.90  | 84.00  | 80.95  | 84.00  | 87.62  |
| 91.00  | 58.10  | 91.00  | 72.38  | 91.00  | 91.43  | 91.00  | 98.10  |
| 98.00  | 70.48  | 98.00  | 86.67  | 98.00  | 92.38  | 98.00  | 97.14  |
| 105.00 | 62.86  | 105.00 | 68.57  | 105.00 | 98.10  | 105.00 | 92.38  |
| 112.00 | 75.24  | 112.00 | 81.90  | 112.00 | 79.05  | 112.00 | 96.19  |
| 119.00 | 70.48  | 119.00 | 72.38  | 119.00 | 92.38  | 119.00 | 91.43  |
| 126.00 | 60.00  | 126.00 | 81.90  | 126.00 | 91.43  | 126.00 | 91.43  |
| 133.00 | 62.86  | 133.00 | 75.24  | 133.00 | 98.10  | 133.00 | 90.48  |
| 140.00 | 70.48  | 140.00 | 79.05  | 140.00 | 78.10  | 140.00 | 94.29  |
| 147.00 | 59.05  | 147.00 | 79.05  | 147.00 | 91.43  | 147.00 | 93.33  |
| 154.00 | 72.38  | 154.00 | 72.38  | 154.00 | 91.43  | 154.00 | 92.38  |
| 161.00 | 64.76  | 161.00 | 73.33  | 161.00 | 95.24  | 161.00 | 88.57  |
| 168.00 | 69.52  | 168.00 | 80.00  | 168.00 | 78.10  | 168.00 | 99.05  |
| 175.00 | 64.76  | 175.00 | 70.48  | 175.00 | 90.48  | 175.00 | 108.57 |
| 182.00 | 66.67  | 182.00 | 80.95  | 182.00 | 90.48  | 182.00 | 86.67  |
| 189.00 | 59.05  | 189.00 | 79.05  | 189.00 | 95.24  | 189.00 | 102.86 |
| 196.00 | 68.57  | 196.00 | 76.19  | 196.00 | 78.10  | 196.00 | 102.86 |
| 203.00 | 66.67  | 203.00 | 77.14  | 203.00 | 90.48  | 203.00 | 104.76 |
| 210.00 | 60.00  | 210.00 | 72.38  | 210.00 | 85.71  | 210.00 | 99.05  |
| 217.00 | 60.95  | 217.00 | 75.24  | 217.00 | 98.10  | 217.00 | 104.76 |
| 224.00 | 71.43  | 224.00 | 74.29  | 224.00 | 77.14  | 224.00 | 104.76 |
| 231.00 | 68.57  | 231.00 | 71.43  | 231.00 | 89.52  | 231.00 | 100.95 |
| 238.00 | 57.14  | 238.00 | 77.14  | 238.00 | 86.67  | 238.00 | 102.86 |
| 245.00 | 61.90  | 245.00 | 77.14  | 245.00 | 96.19  | 245.00 | 100.00 |
| 252.00 | 67.62  | 252.00 | 70.48  | 252.00 | 78.10  | 252.00 | 108.57 |
| 259.00 | 56.19  | 259.00 | 82.86  | 259.00 | 86.67  | 259.00 | 99.05  |
| 266.00 | 61.90  | 266.00 | 67.62  | 266.00 | 83.81  | 266.00 | 105.71 |
| 273.00 | 68.57  | 273.00 | 74.29  | 273.00 | 86.67  | 273.00 | 101.90 |
| 280.00 | 66.67  | 280.00 | 78.10  | 280.00 | 87.62  | 280.00 | 100.95 |
| 287.00 | 57.14  | 287.00 | 78.10  | 287.00 | 81.90  | 287.00 | 97.14  |
| 294.00 | 64.76  | 294.00 | 74.29  | 294.00 | 77.92  | 294.00 | 103.81 |
| 301.00 | 65.71  | 301.00 | 76.19  | 301.00 | 89.52  | 301.00 | 108.57 |
| 308.00 | 67.62  | 308.00 | 69.52  | 308.00 | 86.67  | 308.00 | 100.00 |
| 315.00 | 54.29  | 315.00 | 75.24  | 315.00 | 87.62  | 315.00 | 101.90 |
| 322.00 | 86.67  | 322.00 | 77.14  | 322.00 | 93.33  | 322.00 | 91.43  |
| 329.00 | 56.19  | 329.00 | 73.33  | 329.00 | 132.38 | 329.00 | 139.05 |
| 336.00 | 68.57  | 336.00 | 95.24  | 336.00 | 88.57  | 336.00 | 102.86 |
| 343.00 | 166.67 | 343.00 | 78.10  | 343.00 | 86.67  | 343.00 | 101.90 |
| 350.00 | 59.05  | 350.00 | 79.05  | 350.00 | 254.29 | 350.00 | 265.71 |
| 357.00 | 60.95  | 357.00 | 201.90 | 357.00 | 95.24  | 357.00 | 99.05  |
| 364.00 | 169.52 | 364.00 | 77.14  | 364.00 | 86.67  | 364.00 | 98.10  |
| 371.00 | 62.86  | 371.00 | 78.10  | 371.00 | 250.48 | 371.00 | 257.14 |
| 378.00 | 52.81  | 378.00 | 203.81 | 378.00 | 91.43  | 378.00 | 94.29  |
| 385.00 | 172.38 | 385.00 | 73.33  | 385.00 | 91.43  | 385.00 | 91.43  |
| 392.00 | 60.00  | 392.00 | 80.00  | 392.00 | 253.33 | 392.00 | 262.86 |
| 399.00 | 63.81  | 399.00 | 202.86 | 399.00 | 92.38  | 399.00 | 86.67  |
| 406.00 | 169.52 | 406.00 | 73.33  | 406.00 | 93.33  | 406.00 | 95.24  |
| 413.00 | 53.68  | 413.00 | 77.14  | 413.00 | 250.48 | 413.00 | 255.24 |
| 420.00 | 62.86  | 420.00 | 200.00 | 420.00 | 90.48  | 420.00 | 84.76  |



|        |        |        |        |        |        |        |        |
|--------|--------|--------|--------|--------|--------|--------|--------|
| 427.00 | 158.10 | 427.00 | 71.43  | 427.00 | 85.71  | 427.00 | 92.38  |
| 434.00 | 60.61  | 434.00 | 76.19  | 434.00 | 256.19 | 434.00 | 254.29 |
| 441.00 | 55.24  | 441.00 | 209.52 | 441.00 | 90.48  | 441.00 | 93.33  |
| 448.00 | 167.62 | 448.00 | 69.52  | 448.00 | 89.52  | 448.00 | 99.05  |
| 455.00 | 54.29  | 455.00 | 79.05  | 455.00 | 232.38 | 455.00 | 243.81 |
| 462.00 | 66.67  | 462.00 | 202.86 | 462.00 | 94.29  | 462.00 | 104.76 |
| 469.00 | 167.62 | 469.00 | 70.48  | 469.00 | 84.76  | 469.00 | 80.95  |
| 476.00 | 56.19  | 476.00 | 79.05  | 476.00 | 248.57 | 476.00 | 278.10 |
| 483.00 | 57.14  | 483.00 | 205.71 | 483.00 | 87.62  | 483.00 | 81.90  |
| 490.00 | 172.38 | 490.00 | 73.33  | 490.00 | 91.43  | 490.00 | 97.14  |
| 497.00 | 57.14  | 497.00 | 75.24  | 497.00 | 248.57 | 497.00 | 277.14 |
| 504.00 | 58.10  | 504.00 | 204.76 | 504.00 | 91.43  | 504.00 | 87.62  |
| 511.00 | 155.24 | 511.00 | 70.48  | 511.00 | 82.86  | 511.00 | 90.48  |
| 518.00 | 67.62  | 518.00 | 78.10  | 518.00 | 243.81 | 518.00 | 207.62 |
| 525.00 | 50.48  | 525.00 | 200.00 | 525.00 | 91.43  | 525.00 | 64.76  |
| 532.00 | 163.81 | 532.00 | 71.43  | 532.00 | 85.71  | 532.00 | 53.33  |
| 539.00 | 56.19  | 539.00 | 76.19  | 539.00 | 239.05 |        |        |
| 546.00 | 68.57  | 546.00 | 203.81 | 546.00 | 62.86  |        |        |
| 553.00 | 160.00 | 553.00 | 73.33  | 553.00 | 65.71  |        |        |
| 560.00 | 56.19  | 560.00 | 73.33  | 560.00 | 158.10 |        |        |
| 567.00 | 54.29  | 567.00 | 205.71 | 567.00 | 49.52  |        |        |
| 574.00 | 168.57 | 574.00 | 76.19  | 574.00 | 47.62  |        |        |
| 581.00 | 56.19  | 581.00 | 73.33  | 581.00 | 102.86 |        |        |
| 588.00 | 59.05  | 588.00 | 202.86 |        |        |        |        |
| 595.00 | 163.81 | 595.00 | 70.48  |        |        |        |        |
| 602.00 | 61.90  | 602.00 | 79.05  |        |        |        |        |
| 609.00 | 54.29  | 609.00 | 198.10 |        |        |        |        |
| 616.00 | 155.24 | 616.00 | 69.52  |        |        |        |        |
| 623.00 | 64.76  | 623.00 | 73.33  |        |        |        |        |
| 630.00 | 51.43  | 630.00 | 174.29 |        |        |        |        |
| 637.00 | 163.81 | 637.00 | 60.95  |        |        |        |        |
| 644.00 | 52.38  | 644.00 | 48.57  |        |        |        |        |
| 651.00 | 70.48  | 651.00 | 131.43 |        |        |        |        |
| 658.00 | 152.38 | 658.00 | 40.95  |        |        |        |        |
| 665.00 | 60.00  | 665.00 | 38.10  |        |        |        |        |
| 672.00 | 56.19  | 672.00 | 92.38  |        |        |        |        |
| 679.00 | 165.71 | 679.00 | 31.43  |        |        |        |        |
| 686.00 | 50.48  | 686.00 | 28.57  |        |        |        |        |
| 693.00 | 54.29  | 693.00 | 71.43  |        |        |        |        |
| 700.00 | 166.67 |        |        |        |        |        |        |
| 707.00 | 53.33  |        |        |        |        |        |        |
| 714.00 | 60.95  |        |        |        |        |        |        |
| 721.00 | 156.19 |        |        |        |        |        |        |
| 728.00 | 62.86  |        |        |        |        |        |        |
| 735.00 | 52.38  |        |        |        |        |        |        |
| 742.00 | 139.05 |        |        |        |        |        |        |
| 749.00 | 50.48  |        |        |        |        |        |        |
| 756.00 | 38.10  |        |        |        |        |        |        |
| 763.00 | 104.76 |        |        |        |        |        |        |

### 3.3. Investigating the influence of excipients on membrane performance during solvent exchange

Table S5 Permeate flux profile for the diafiltration with an aqueous feed containing: (1) 0.1 wt% HPMC E3 solution (in water), (2) 0.1 wt% model particles and 0.1 wt% HPMC E3 in water, (3) 5 wt% ethanol solution and (4) an aqueous feed containing 0.1 wt% model particles and 5 wt% ethanol. Corresponds to Figure 4 in the manuscript.

| Time | Flux                                | Flux                                | Flux                                | Flux                                |
|------|-------------------------------------|-------------------------------------|-------------------------------------|-------------------------------------|
| s    | kg (m <sup>2</sup> h) <sup>-1</sup> |
|      | HPMC in Water                       | HPMC + Model particles in Water     | Ethanol / Water                     | Model particles in Ethanol / Water  |
| 0.00 |                                     |                                     |                                     |                                     |
| 0.17 | 64.22                               | 53.52                               | 96.00                               | 75.00                               |
| 0.33 | 63.14                               | 50.32                               | 96.00                               | 75.00                               |
| 0.50 | 59.86                               | 46.63                               | 96.00                               | 75.00                               |
| 0.67 | 57.25                               | 43.94                               | 96.00                               | 75.00                               |
| 0.83 | 55.14                               | 41.70                               | 96.00                               | 75.00                               |
| 1.00 | 53.66                               | 39.99                               | 96.00                               | 75.00                               |
| 1.17 | 52.34                               | 38.41                               | 96.00                               | 75.00                               |
| 1.33 | 51.23                               | 37.14                               | 96.00                               | 75.00                               |
| 1.50 | 50.11                               | 35.91                               | 96.00                               | 75.00                               |
| 1.67 | 49.16                               | 34.89                               | 96.00                               | 75.00                               |
| 1.83 | 48.34                               | 33.82                               | 96.00                               | 75.00                               |
| 2.00 | 47.71                               | 32.78                               | 96.00                               | 75.00                               |
| 2.17 | 47.02                               | 32.16                               | 96.00                               | 75.00                               |
| 2.33 | 46.45                               | 31.36                               | 96.00                               | 75.00                               |
| 2.50 | 45.90                               | 30.67                               | 96.00                               | 75.00                               |
| 2.67 | 45.38                               | 30.00                               | 96.00                               | 75.00                               |
| 2.83 | 44.90                               | 29.40                               | 96.00                               | 75.00                               |
| 3.00 | 44.49                               | 28.89                               | 96.00                               | 75.00                               |
| 3.17 | 44.06                               | 28.29                               | 96.00                               | 75.00                               |
| 3.33 | 43.60                               | 27.65                               | 96.00                               | 75.00                               |
| 3.50 | 43.39                               | 27.11                               | 96.00                               | 75.00                               |
| 3.67 | 42.81                               | 26.73                               | 96.00                               | 75.00                               |
| 3.83 | 42.61                               | 26.27                               | 96.00                               | 75.00                               |
| 4.00 | 42.17                               | 25.89                               | 96.00                               | 75.00                               |
| 4.17 | 41.91                               | 25.38                               | 96.00                               | 75.00                               |
| 4.33 | 41.62                               | 24.98                               | 96.00                               | 75.00                               |
| 4.50 | 41.21                               | 24.65                               | 96.00                               | 75.00                               |
| 4.67 | 40.89                               | 24.25                               | 96.00                               | 75.00                               |
| 4.83 | 40.70                               | 23.85                               | 96.00                               | 75.00                               |
| 5.00 | 40.40                               | 23.65                               | 96.00                               | 75.00                               |
| 5.17 | 40.13                               | 23.31                               | 96.00                               | 75.00                               |
| 5.33 | 39.78                               | 23.00                               | 96.00                               | 75.00                               |
| 5.50 | 39.54                               | 22.67                               | 96.00                               | 75.00                               |
| 5.67 | 39.33                               | 22.40                               | 96.00                               | 75.00                               |
| 5.83 | 39.13                               | 22.05                               | 96.00                               | 75.00                               |
| 6.00 | 38.69                               | 21.87                               | 96.00                               | 75.00                               |

|       |       |       |       |       |
|-------|-------|-------|-------|-------|
| 6.17  | 38.44 | 21.60 | 96.00 | 75.00 |
| 6.33  | 38.24 | 21.18 | 96.00 | 75.00 |
| 6.50  | 38.07 | 20.99 | 96.00 | 75.00 |
| 6.67  | 37.84 | 20.72 | 96.00 | 75.00 |
| 6.83  | 37.69 | 20.70 | 96.00 | 75.00 |
| 7.00  | 37.50 | 20.48 | 96.00 | 75.00 |
| 7.17  | 37.27 | 20.26 | 96.00 | 75.00 |
| 7.33  | 37.11 | 20.03 | 96.00 | 75.00 |
| 7.50  | 36.81 | 19.92 | 96.00 | 75.00 |
| 7.67  | 36.61 | 19.68 | 96.00 | 75.00 |
| 7.83  | 36.45 | 19.50 | 96.00 | 75.00 |
| 8.00  | 36.31 | 19.26 | 96.00 | 75.00 |
| 8.17  | 36.07 | 19.12 | 96.00 | 75.00 |
| 8.33  | 35.84 | 19.10 | 96.00 | 75.00 |
| 8.50  | 35.50 | 19.04 | 96.00 | 75.00 |
| 8.67  | 35.46 | 18.88 | 96.00 | 75.00 |
| 8.83  | 35.19 | 18.70 | 96.00 | 75.00 |
| 9.00  | 35.16 | 18.59 | 96.00 | 75.00 |
| 9.17  | 34.88 | 18.44 | 96.00 | 75.00 |
| 9.33  | 34.76 | 18.35 | 96.00 | 75.00 |
| 9.50  | 34.53 | 18.24 | 96.00 | 75.00 |
| 9.67  | 34.43 | 18.10 | 96.00 | 75.00 |
| 9.83  | 34.21 | 18.01 | 96.00 | 75.00 |
| 10.00 | 34.15 | 17.81 | 96.00 | 75.00 |
| 10.17 | 33.92 | 17.61 | 96.00 | 75.00 |
| 10.33 | 33.81 | 17.57 | 96.00 | 75.00 |
| 10.50 | 33.68 | 17.46 | 96.00 | 75.00 |
| 10.67 | 33.52 | 17.30 | 96.00 | 75.00 |
| 10.83 | 33.59 | 17.30 | 96.00 | 75.00 |
| 11.00 | 33.51 | 17.12 | 96.00 | 75.00 |
| 11.17 | 33.31 | 17.04 | 96.00 | 75.00 |
| 11.33 | 33.05 | 16.99 | 96.00 | 75.00 |
| 11.50 | 32.91 | 16.93 | 96.00 | 75.00 |
| 11.67 | 32.83 | 16.77 | 96.00 | 75.00 |
| 11.83 | 32.75 | 16.73 | 96.00 | 75.00 |
| 12.00 | 32.52 | 16.57 | 96.00 | 75.00 |
| 12.17 | 32.20 | 16.48 | 96.00 | 75.00 |
| 12.33 | 32.16 | 16.41 | 96.00 | 75.00 |
| 12.50 | 32.12 | 16.30 | 96.00 | 75.00 |
| 12.67 | 32.10 | 16.33 | 96.00 | 75.00 |
| 12.83 | 31.96 | 16.17 | 96.00 | 75.00 |
| 13.00 | 31.66 | 16.08 | 96.00 | 75.00 |
| 13.17 | 31.61 | 15.97 | 96.00 | 75.00 |
| 13.33 | 31.64 | 15.95 | 96.00 | 75.00 |
| 13.50 | 31.63 | 15.77 | 96.00 | 75.00 |
| 13.67 | 31.44 | 15.77 | 96.00 | 75.00 |
| 13.83 | 31.33 | 15.66 | 96.00 | 75.00 |
| 14.00 | 31.30 | 15.55 | 96.00 | 75.00 |
| 14.17 | 31.23 | 15.48 | 96.00 | 75.00 |

|       |       |       |       |       |
|-------|-------|-------|-------|-------|
| 14.33 | 31.07 | 15.46 | 96.00 | 75.00 |
| 14.50 | 31.00 | 15.35 | 96.00 | 75.00 |
| 14.67 | 30.96 | 15.24 | 96.00 | 75.00 |
| 14.83 | 30.88 | 15.10 | 96.00 | 75.00 |
| 15.00 | 30.68 | 15.15 | 96.00 | 75.00 |
| 15.17 | 30.63 | 15.15 | 96.00 | 75.00 |
| 15.33 | 30.64 | 15.06 | 96.00 | 75.00 |
| 15.50 | 30.53 | 15.10 | 96.00 | 75.00 |
| 15.67 | 30.57 | 14.93 | 96.00 | 75.00 |
| 15.83 | 30.30 | 14.84 | 96.00 | 75.00 |
| 16.00 | 30.32 | 14.72 | 96.00 | 75.00 |
| 16.17 | 30.29 | 14.68 | 96.00 | 75.00 |
| 16.33 | 30.25 | 14.59 | 96.00 | 75.00 |
| 16.50 | 30.13 | 14.50 | 96.00 | 75.00 |
| 16.67 | 30.11 | 14.54 | 96.00 | 75.00 |
| 16.83 | 30.08 | 14.32 | 96.00 | 75.00 |
| 17.00 | 29.89 | 14.48 | 96.00 | 75.00 |

*3.4. Case study: Removing ethanol from a naproxen crystal suspension after anti-solvent crystallization*

Table S6 Permeate flux profile over time during discontinuous and semi-continuous diafiltration of naproxen crystals (0.2 wt%) suspended in a solution of 0.1 wt% HPMC E3, 3.8 wt% ethanol and 95.9 wt% water. The suspension used in both cases had the same composition. The data corresponds to the figure 5 of the manuscript.

| Time<br>s | Flux<br>kg (m <sup>2</sup> h) <sup>-1</sup> |                 |
|-----------|---------------------------------------------|-----------------|
|           | Discontinuous                               | Semi-continuous |
| 0.17      | 39.70                                       | 40.55           |
| 0.50      | 37.28                                       | 38.32           |
| 0.83      | 34.48                                       | 35.50           |
| 1.17      | 32.44                                       | 33.97           |
| 1.50      | 30.92                                       | 32.76           |
| 1.83      | 29.68                                       | 31.72           |
| 2.17      | 28.61                                       | 30.80           |
| 2.50      | 27.75                                       | 29.92           |
| 2.83      | 27.06                                       | 29.29           |
| 3.17      | 26.48                                       | 28.70           |
| 3.50      | 25.88                                       | 28.17           |
| 3.83      | 25.33                                       | 27.72           |
| 4.17      | 25.02                                       | 27.12           |
| 4.50      | 24.57                                       | 26.65           |
| 4.83      | 24.30                                       | 26.23           |
| 5.17      | 23.82                                       | 25.68           |
| 5.50      | 23.44                                       | 25.27           |
| 5.83      | 23.08                                       | 25.01           |
| 6.17      | 22.64                                       | 24.67           |

---

|       |       |       |
|-------|-------|-------|
| 6.50  | 22.24 | 24.36 |
| 6.83  | 21.88 | 24.08 |
| 7.17  | 21.50 | 23.92 |
| 7.50  | 21.13 | 23.66 |
| 7.83  | 20.77 | 23.33 |
| 8.17  | 20.39 | 23.02 |
| 8.50  | 20.11 | 22.93 |
| 8.83  | 19.84 | 22.68 |
| 9.17  | 19.39 | 22.50 |
| 9.50  | 19.04 | 22.28 |
| 9.83  | 18.68 | 21.93 |
| 10.17 | 18.51 | 21.91 |
| 10.50 | 18.28 | 21.64 |
| 10.83 | 18.00 | 21.47 |
| 11.17 | 17.86 | 21.33 |
| 11.50 | 17.71 | 21.00 |
| 11.83 | 17.53 | 21.00 |
| 12.17 | 17.42 | 20.64 |
| 12.50 | 17.31 | 20.82 |
| 12.83 | 17.02 | 20.65 |
| 13.17 | 16.99 | 20.49 |
| 13.50 | 16.77 | 20.05 |
| 13.83 | 16.59 | 19.85 |
| 14.17 | 16.48 | 19.58 |
| 14.50 | 16.42 | 19.37 |
| 14.83 | 16.26 | 19.13 |
| 15.17 | 16.11 | 18.97 |
| 15.50 | 16.00 | 18.58 |
| 15.83 | 15.91 | 18.10 |
| 16.17 | 15.77 | 18.15 |
| 16.50 | 15.60 | 18.16 |
| 16.83 | 15.57 | 17.83 |
| 17.17 | 15.40 | 17.61 |
| 17.50 | 15.31 | 17.25 |
| 17.83 | 15.31 | 16.96 |
| 18.17 | 15.02 | 17.25 |
| 18.50 | 14.82 | 17.10 |
| 18.83 | 37.59 | 16.99 |
| 19.17 | 35.50 | 16.75 |
| 19.50 | 33.30 | 16.81 |
| 19.83 | 31.88 | 16.77 |
| 20.17 | 30.59 | 16.66 |
| 20.50 | 29.52 | 16.67 |
| 20.83 | 28.48 | 16.62 |
| 21.17 | 27.61 | 16.58 |
| 21.50 | 26.86 | 16.44 |
| 21.83 | 26.35 | 16.21 |
| 22.17 | 25.68 | 16.44 |
| 22.50 | 25.15 | 16.36 |

---

---

|       |       |       |
|-------|-------|-------|
| 22.83 | 24.64 | 16.44 |
| 23.17 | 24.24 | 15.93 |
| 23.50 | 23.79 | 16.09 |
| 23.83 | 23.33 | 16.09 |
| 24.17 | 22.99 | 16.23 |
| 24.50 | 22.68 | 15.97 |
| 24.83 | 22.30 | 15.88 |
| 25.17 | 21.99 | 15.79 |
| 25.50 | 21.68 | 15.50 |
| 25.83 | 21.39 | 15.70 |
| 26.17 | 21.17 | 15.67 |
| 26.50 | 20.88 | 15.32 |
| 26.83 | 20.62 | 15.45 |
| 27.17 | 20.35 | 15.44 |
| 27.50 | 20.13 | 15.37 |
| 27.83 | 19.93 | 15.72 |
| 28.17 | 19.64 | 15.68 |
| 28.50 | 19.55 | 15.74 |
| 28.83 | 19.39 | 15.61 |
| 29.17 | 19.10 | 15.72 |
| 29.50 | 18.88 | 16.13 |
| 29.83 | 18.66 | 16.47 |
| 30.17 | 18.57 | 16.56 |
| 30.50 | 18.42 | 17.08 |
| 30.83 | 18.35 | 16.88 |
| 31.17 | 18.11 | 16.92 |
| 31.50 | 17.97 | 17.25 |
| 31.83 | 17.84 | 17.28 |
| 32.17 | 17.68 | 17.29 |
| 32.50 | 17.46 | 17.72 |
| 32.83 | 17.42 | 17.21 |
| 33.17 | 17.37 | 17.47 |
| 33.50 | 17.13 | 17.33 |
| 33.83 | 17.02 | 17.83 |
| 34.17 | 17.00 | 17.79 |
| 34.50 | 16.97 | 17.50 |
| 34.83 | 16.79 | 17.26 |
| 35.17 | 16.59 | 17.24 |
| 35.50 | 16.53 | 17.32 |
| 35.83 | 16.37 | 17.61 |
| 36.17 | 16.33 | 17.23 |
| 36.50 | 16.26 | 17.25 |
| 36.83 | 15.86 | 17.33 |
| 37.17 | 15.86 | 17.41 |
| 37.50 | 39.08 | 16.97 |
| 37.83 | 38.10 | 17.21 |
| 38.17 | 35.59 | 17.07 |
| 38.50 | 33.92 | 17.09 |
| 38.83 | 32.52 | 16.65 |

---

---

|       |       |       |
|-------|-------|-------|
| 39.17 | 31.21 | 16.75 |
| 39.50 | 30.19 | 16.77 |
| 39.83 | 29.17 | 17.18 |
| 40.17 | 28.41 | 16.76 |
| 40.50 | 27.52 | 16.83 |
| 40.83 | 26.92 | 16.94 |
| 41.17 | 26.32 | 17.10 |
| 41.50 | 25.86 | 16.79 |
| 41.83 | 25.30 | 17.07 |
| 42.17 | 24.88 | 16.87 |
| 42.50 | 24.44 | 17.13 |
| 42.83 | 24.08 | 16.96 |
| 43.17 | 23.82 | 16.79 |
| 43.50 | 23.31 | 16.93 |
| 43.83 | 22.95 | 17.06 |
| 44.17 | 22.71 | 17.02 |
| 44.50 | 22.33 | 17.02 |
| 44.83 | 22.17 | 16.63 |
| 45.17 | 21.77 | 17.22 |
| 45.50 | 21.68 | 16.95 |
| 45.83 | 21.35 | 16.75 |
| 46.17 | 21.13 | 16.69 |
| 46.50 | 20.84 | 17.10 |
| 46.83 | 20.68 | 16.67 |
| 47.17 | 20.44 | 16.67 |
| 47.50 | 20.33 | 16.54 |
| 47.83 | 19.95 | 16.68 |
| 48.17 | 19.93 | 16.84 |
| 48.50 | 19.77 | 16.79 |
| 48.83 | 19.55 | 16.82 |
| 49.17 | 19.35 | 16.70 |
| 49.50 | 19.26 | 16.74 |
| 49.83 | 19.06 | 16.72 |
| 50.17 | 18.86 | 16.59 |
| 50.50 | 18.75 | 16.63 |
| 50.83 | 18.60 | 16.58 |
| 51.17 | 18.39 | 16.62 |
| 51.50 | 18.42 | 16.61 |
| 51.83 | 18.22 | 16.64 |
| 52.17 | 17.93 | 16.71 |
| 52.50 | 17.75 | 16.69 |
| 52.83 | 17.68 | 16.58 |
| 53.17 | 17.22 | 16.68 |
| 53.50 | 17.13 | 16.61 |
| 53.83 | 17.20 | 16.49 |
| 54.17 | 17.20 | 16.60 |
| 54.50 | 17.00 | 16.49 |
| 54.83 | 16.80 | 16.56 |
| 55.17 | 16.73 | 16.42 |

---

---

|       |       |       |
|-------|-------|-------|
| 55.50 | 39.52 | 16.48 |
| 55.83 | 37.65 | 16.46 |
| 56.17 | 35.41 | 16.48 |
| 56.50 | 33.61 | 16.45 |
| 56.83 | 32.21 | 16.47 |
| 57.17 | 31.10 | 16.45 |
| 57.50 | 30.08 | 16.29 |
| 57.83 | 29.12 | 16.41 |
| 58.17 | 28.50 | 16.34 |
| 58.50 | 27.77 | 16.53 |
| 58.83 | 27.13 | 16.39 |
| 59.17 | 26.59 | 16.32 |
| 59.50 | 26.06 | 16.37 |
| 59.83 | 25.62 | 16.41 |
| 60.17 | 25.22 | 16.55 |
| 60.50 | 24.90 | 16.45 |
| 60.83 | 24.37 | 16.40 |
| 61.17 | 24.13 | 16.35 |
| 61.50 | 23.84 | 16.47 |
| 61.83 | 23.50 | 16.41 |
| 62.17 | 23.17 | 16.37 |
| 62.50 | 22.88 | 16.41 |
| 62.83 | 22.57 | 16.45 |
| 63.17 | 22.13 | 16.45 |
| 63.50 | 21.95 | 16.32 |
| 63.83 | 21.77 | 16.40 |
| 64.17 | 21.48 | 16.37 |
| 64.50 | 21.28 | 16.42 |
| 64.83 | 20.99 | 16.27 |
| 65.17 | 20.93 | 16.26 |
| 65.50 | 20.64 | 16.38 |
| 65.83 | 20.66 | 16.29 |
| 66.17 | 20.39 | 16.33 |
| 66.50 | 20.11 | 16.22 |
| 66.83 | 19.57 | 16.28 |
| 67.17 | 19.31 | 16.34 |
| 67.50 | 19.19 | 16.29 |
| 67.83 | 19.13 | 16.19 |
| 68.17 | 19.13 | 16.16 |
| 68.50 | 18.71 | 16.16 |
| 68.83 | 18.84 | 16.20 |
| 69.17 | 18.53 | 16.22 |
| 69.50 | 18.39 | 16.17 |
| 69.83 | 18.44 | 16.16 |
| 70.17 | 18.11 | 16.11 |
| 70.50 | 17.88 | 15.98 |
| 70.83 | 17.82 | 16.06 |
| 71.17 | 17.71 | 16.09 |
| 71.50 | 17.46 | 16.03 |

---



---

|       |       |       |
|-------|-------|-------|
| 71.83 | 17.82 | 16.01 |
| 72.17 | 17.77 | 15.87 |
| 72.50 |       | 15.97 |
| 72.83 |       | 16.01 |
| 73.17 |       | 16.03 |
| 73.50 |       | 15.90 |
| 73.83 |       | 16.00 |
| 74.17 |       | 16.01 |
| 74.50 |       | 15.92 |
| 74.83 |       | 15.84 |
| 75.17 |       | 15.94 |
| 75.50 |       | 15.99 |
| 75.83 |       | 16.03 |
| 76.17 |       | 15.83 |
| 76.50 |       | 15.81 |
| 76.83 |       | 15.78 |
| 77.17 |       | 15.91 |
| 77.50 |       | 15.94 |
| 77.83 |       | 15.89 |
| 78.17 |       | 15.82 |
| 78.50 |       | 15.95 |
| 78.83 |       | 15.79 |
| 79.17 |       | 15.83 |
| 79.50 |       | 15.91 |
| 79.83 |       | 15.91 |
| 80.17 |       | 15.82 |
| 80.50 |       | 15.80 |
| 80.83 |       | 15.71 |
| 81.17 |       | 15.83 |
| 81.50 |       | 15.89 |
| 81.83 |       | 15.86 |
| 82.17 |       | 15.92 |
| 82.50 |       | 15.72 |
| 82.83 |       | 15.76 |
| 83.17 |       | 15.68 |
| 83.50 |       | 15.71 |
| 83.83 |       | 15.74 |
| 84.17 |       | 15.68 |
| 84.50 |       | 15.71 |
| 84.83 |       | 15.76 |
| 85.17 |       | 15.71 |
| 85.50 |       | 15.67 |
| 85.83 |       | 15.73 |
| 86.17 |       | 15.67 |
| 86.50 |       | 15.63 |
| 43.50 |       | 16.93 |
| 43.67 |       | 17.22 |
| 43.83 |       | 17.06 |
| 44.00 |       | 17.22 |

---

---

|       |       |
|-------|-------|
| 44.17 | 17.02 |
| 44.33 | 16.90 |
| 44.50 | 17.02 |
| 44.67 | 16.70 |
| 44.83 | 16.63 |
| 45.00 | 16.77 |
| 45.17 | 17.22 |
| 45.33 | 17.09 |
| 45.50 | 16.95 |
| 45.67 | 16.89 |
| 45.83 | 16.75 |
| 46.00 | 17.12 |
| 46.17 | 16.69 |
| 46.33 | 16.77 |
| 46.50 | 17.10 |
| 46.67 | 16.83 |
| 46.83 | 16.67 |
| 47.00 | 16.45 |
| 47.17 | 16.67 |
| 47.33 | 16.68 |
| 47.50 | 16.54 |
| 47.67 | 16.62 |
| 47.83 | 16.68 |
| 48.00 | 16.75 |
| 48.17 | 16.84 |
| 48.33 | 16.84 |
| 48.50 | 16.79 |
| 48.67 | 16.63 |
| 48.83 | 16.82 |
| 49.00 | 16.63 |
| 49.17 | 16.70 |
| 49.33 | 16.76 |
| 49.50 | 16.74 |
| 49.67 | 16.80 |
| 49.83 | 16.72 |
| 50.00 | 16.70 |
| 50.17 | 16.59 |
| 50.33 | 16.63 |
| 50.50 | 16.63 |
| 50.67 | 16.56 |
| 50.83 | 16.58 |
| 51.00 | 16.58 |
| 51.17 | 16.62 |
| 51.33 | 16.64 |
| 51.50 | 16.61 |
| 51.67 | 16.69 |
| 51.83 | 16.64 |
| 52.00 | 16.81 |
| 52.17 | 16.71 |

---

---

|       |       |
|-------|-------|
| 52.33 | 16.64 |
| 52.50 | 16.69 |
| 52.67 | 16.62 |
| 52.83 | 16.58 |
| 53.00 | 16.61 |
| 53.17 | 16.68 |
| 53.33 | 16.53 |
| 53.50 | 16.61 |
| 53.67 | 16.58 |
| 53.83 | 16.49 |
| 54.00 | 16.53 |
| 54.17 | 16.60 |
| 54.33 | 16.48 |
| 54.50 | 16.49 |
| 54.67 | 16.51 |
| 54.83 | 16.56 |
| 55.00 | 16.40 |
| 55.17 | 16.42 |
| 55.33 | 16.52 |
| 55.50 | 16.48 |
| 55.67 | 16.56 |
| 55.83 | 16.46 |
| 56.00 | 16.48 |
| 56.17 | 16.48 |
| 56.33 | 16.41 |
| 56.50 | 16.45 |
| 56.67 | 16.48 |
| 56.83 | 16.47 |
| 57.00 | 16.43 |
| 57.17 | 16.45 |
| 57.33 | 16.44 |
| 57.50 | 16.29 |
| 57.67 | 16.45 |
| 57.83 | 16.41 |
| 58.00 | 16.45 |
| 58.17 | 16.34 |
| 58.33 | 16.46 |
| 58.50 | 16.53 |
| 58.67 | 16.46 |
| 58.83 | 16.39 |
| 59.00 | 16.34 |
| 59.17 | 16.32 |
| 59.33 | 16.38 |
| 59.50 | 16.37 |
| 59.67 | 16.44 |
| 59.83 | 16.41 |
| 60.00 | 16.55 |
| 60.17 | 16.55 |
| 60.33 | 16.43 |

---

---

|       |       |
|-------|-------|
| 60.50 | 16.45 |
| 60.67 | 16.37 |
| 60.83 | 16.40 |
| 61.00 | 16.37 |
| 61.17 | 16.35 |
| 61.33 | 16.46 |
| 61.50 | 16.47 |
| 61.67 | 16.47 |
| 61.83 | 16.41 |
| 62.00 | 16.36 |
| 62.17 | 16.37 |
| 62.33 | 16.41 |
| 62.50 | 16.41 |
| 62.67 | 16.39 |
| 62.83 | 16.45 |
| 63.00 | 16.40 |
| 63.17 | 16.45 |
| 63.33 | 16.45 |
| 63.50 | 16.32 |
| 63.67 | 16.34 |
| 63.83 | 16.40 |
| 64.00 | 16.50 |
| 64.17 | 16.37 |
| 64.33 | 16.36 |
| 64.50 | 16.42 |
| 64.67 | 16.18 |
| 64.83 | 16.27 |
| 65.00 | 16.28 |
| 65.17 | 16.26 |
| 65.33 | 16.35 |
| 65.50 | 16.38 |
| 65.67 | 16.28 |
| 65.83 | 16.29 |
| 66.00 | 16.34 |
| 66.17 | 16.33 |
| 66.33 | 16.29 |
| 66.50 | 16.22 |
| 66.67 | 16.37 |
| 66.83 | 16.28 |
| 67.00 | 16.30 |
| 67.17 | 16.34 |
| 67.33 | 16.29 |
| 67.50 | 16.29 |
| 67.67 | 16.21 |
| 67.83 | 16.19 |
| 68.00 | 16.21 |
| 68.17 | 16.16 |
| 68.33 | 16.20 |
| 68.50 | 16.16 |

---

---

|       |       |
|-------|-------|
| 68.67 | 16.12 |
| 68.83 | 16.20 |
| 69.00 | 16.08 |
| 69.17 | 16.22 |
| 69.33 | 16.24 |
| 69.50 | 16.17 |
| 69.67 | 16.22 |
| 69.83 | 16.16 |
| 70.00 | 16.17 |
| 70.17 | 16.11 |
| 70.33 | 16.03 |
| 70.50 | 15.98 |
| 70.67 | 16.11 |
| 70.83 | 16.06 |
| 71.00 | 16.07 |
| 71.17 | 16.09 |
| 71.33 | 16.00 |
| 71.50 | 16.03 |
| 71.67 | 15.88 |
| 71.83 | 16.01 |
| 72.00 | 15.99 |
| 72.17 | 15.87 |
| 72.33 | 15.94 |
| 72.50 | 15.97 |
| 72.67 | 16.00 |
| 72.83 | 16.01 |
| 73.00 | 16.00 |
| 73.17 | 16.03 |
| 73.33 | 16.00 |
| 73.50 | 15.90 |
| 73.67 | 16.02 |
| 73.83 | 16.00 |
| 74.00 | 15.99 |
| 74.17 | 16.01 |
| 74.33 | 15.96 |
| 74.50 | 15.92 |
| 74.67 | 15.93 |
| 74.83 | 15.84 |
| 75.00 | 15.89 |
| 75.17 | 15.94 |
| 75.33 | 15.95 |
| 75.50 | 15.99 |
| 75.67 | 15.92 |
| 75.83 | 16.03 |
| 76.00 | 15.95 |
| 76.17 | 15.83 |
| 76.33 | 15.83 |
| 76.50 | 15.81 |
| 76.67 | 15.88 |

---

---

|       |       |
|-------|-------|
| 76.83 | 15.78 |
| 77.00 | 15.91 |
| 77.17 | 15.91 |
| 77.33 | 15.82 |
| 77.50 | 15.94 |
| 77.67 | 15.88 |
| 77.83 | 15.89 |
| 78.00 | 15.91 |
| 78.17 | 15.82 |
| 78.33 | 15.82 |
| 78.50 | 15.95 |
| 78.67 | 15.87 |
| 78.83 | 15.79 |
| 79.00 | 15.92 |
| 79.17 | 15.83 |
| 79.33 | 15.81 |
| 79.50 | 15.91 |
| 79.67 | 15.79 |
| 79.83 | 15.91 |
| 80.00 | 15.83 |
| 80.17 | 15.82 |
| 80.33 | 15.77 |
| 80.50 | 15.80 |
| 80.67 | 15.84 |
| 80.83 | 15.71 |
| 81.00 | 15.77 |
| 81.17 | 15.83 |
| 81.33 | 15.85 |
| 81.50 | 15.89 |
| 81.67 | 15.79 |
| 81.83 | 15.86 |
| 82.00 | 15.79 |
| 82.17 | 15.92 |
| 82.33 | 15.92 |
| 82.50 | 15.72 |
| 82.67 | 15.79 |
| 82.83 | 15.76 |
| 83.00 | 15.72 |
| 83.17 | 15.68 |
| 83.33 | 15.75 |
| 83.50 | 15.71 |
| 83.67 | 15.67 |
| 83.83 | 15.74 |
| 84.00 | 15.61 |
| 84.17 | 15.68 |
| 84.33 | 15.72 |
| 84.50 | 15.71 |
| 84.67 | 15.77 |
| 84.83 | 15.76 |

---

---

|       |       |
|-------|-------|
| 85.00 | 15.75 |
| 85.17 | 15.71 |
| 85.33 | 15.80 |
| 85.50 | 15.67 |
| 85.67 | 15.66 |
| 85.83 | 15.73 |
| 86.00 | 15.68 |
| 86.17 | 15.67 |
| 86.33 | 15.67 |
| 86.50 | 15.63 |

---
